# Supplementary material for: Analysis of the Genome of the Heavy Metal Resistant and Hydrocarbon-Degrading Rhizospheric Pseudomonas qingdaonensis ZCR6 Strain and Assessment of Its Plant-Growth-Promoting Traits
Source: MDPI journal article supplement (doi:10.3390/ijms23010214), 2021-12-25
Supplement: s1 [file s1]

**Table S1.** Accession numbers of the sequences of different type *Pseudomonas* spp. strains used in the MLSA phylogenetic analysis.

| Strain                    | Genes        |              |              |
|---------------------------|--------------|--------------|--------------|
|                           | 16S rRNA     | <i>gyrB</i>  | <i>rpoD</i>  |
| <i>P. aeruginosa</i>      | X06684       | AB039386     | AB039607     |
| <i>P. alkylphenolia</i>   | CP009048     | HE577792     | HE577794     |
| <i>P. brassicae</i>       | LC514379     | LC514386     | LC514382     |
| <i>P. graminis</i>        | Y11150       | FN554187     | FN554469     |
| <i>P. huaxiensis</i>      | MH428812     | QKVL01000007 | QKVL01000021 |
| <i>P. japonica</i>        | BBIR01000146 | FZOL01000021 | FZOL01000014 |
| <i>P. laurentiana</i>     | KY471137     | BMQU01000001 | BMQU01000017 |
| <i>P. plecoglossicida</i> | AB009457     | FN554218     | FN554503     |
| <i>P. putida</i>          | AP013070     | AB039451     | AB039581     |
| <i>P. qingdaonensis</i>   | MG589917     | MH758785     | MH758786     |
| <i>P. rhizosphaerae</i>   | CP009533     | FN554224     | FN554510     |
| <i>P. taiwanensis</i>     | EU103629     | FJ418634     | HE577796     |

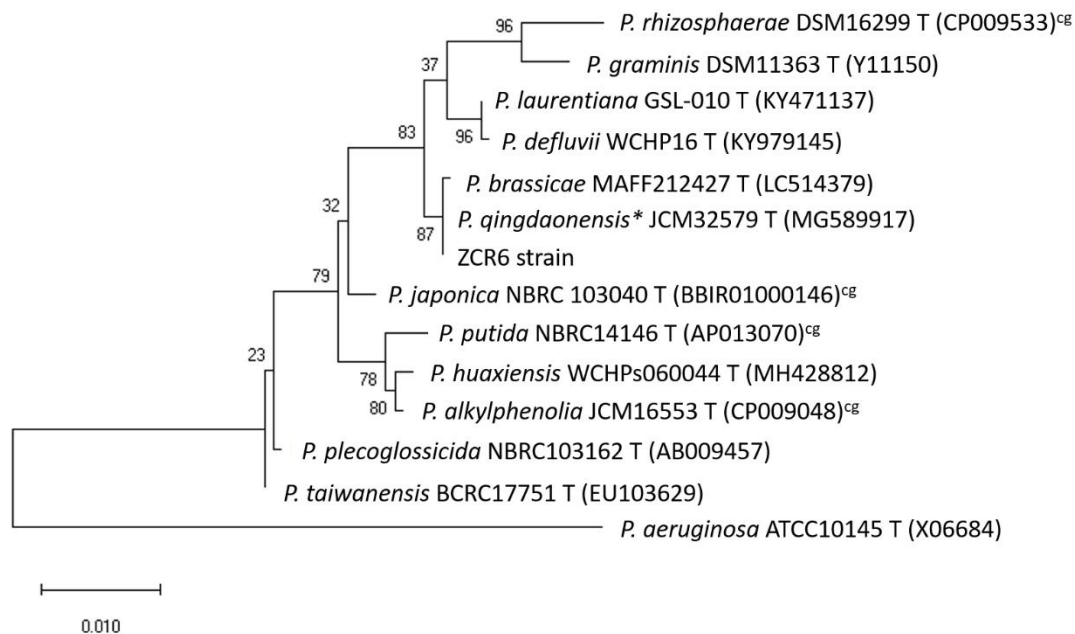

**Figure S1.** Phylogeny of type strains closely related to ZCR6 strain based on 16S rRNA gene sequence (accession numbers of sequences used in this analysis are given in brackets). All positions containing gaps or missing data were eliminated, which resulted in a 1387 bp sequence in the final dataset. Bootstrap values are represented at the branching points. The bar represents 0.010 substitutions per site. <sup>cg</sup> – sequence was extracted from complete genome sequence using Geneious Prime software; \* strain JJ3<sup>T</sup> with the highest ANI value.

**Table S2.** Secondary metabolites region recognized in the genome of the ZCR6 strain.

| Region      | Type             | From    | To      | Most similar known cluster | Similarity                    |
|-------------|------------------|---------|---------|----------------------------|-------------------------------|
| Region 1.1  | Redox-cofactor   | 56.874  | 79.033  | Lankacidin C               | NRP+Polyketide 13%            |
| Region 2.1  | Thiopeptide, Lap | 219.667 | 269.077 |                            |                               |
| Region 5.1  | TransAT-PKS      | 77.087  | 134.533 | Toblerol A                 | Polyketide 45%                |
| Region 4.1  | Betalactone      | 28.838  | 58.571  |                            |                               |
| Region 9.1  | NAGGN            | 71.163  | 85.906  |                            |                               |
| Region 12.1 | NRPS             | 1       | 65.143  | Pyoverdin                  | NRP 17%                       |
|             |                  |         |         | Viscosin                   | NRP 45%                       |
|             |                  |         |         | Gacamide A                 | NRP: Lipopeptide 57%          |
|             |                  |         |         | Orfamide B                 | NRP + Cyclic depsipeptide 50% |
|             |                  |         |         | Putisolvin                 | NRP 50%                       |
|             |                  |         |         | Anikasin                   | NRP 44%                       |
|             |                  |         |         |                            |                               |
| Region 13.1 | NRPS             | 1       | 29.5    | Pyoverdin                  | NRP 11%                       |
| Region 30.1 | NRPS             | 1       | 6.827   | Rhizomide B                | NRP 100%                      |
| Region 34.1 | NRPS             | 1       | 3.686   |                            |                               |

NRP - Nonribosomal peptides, NRPS - Nonribosomal peptide synthetases,  
NAGGN - N-acetylglutaminylglutamine amide

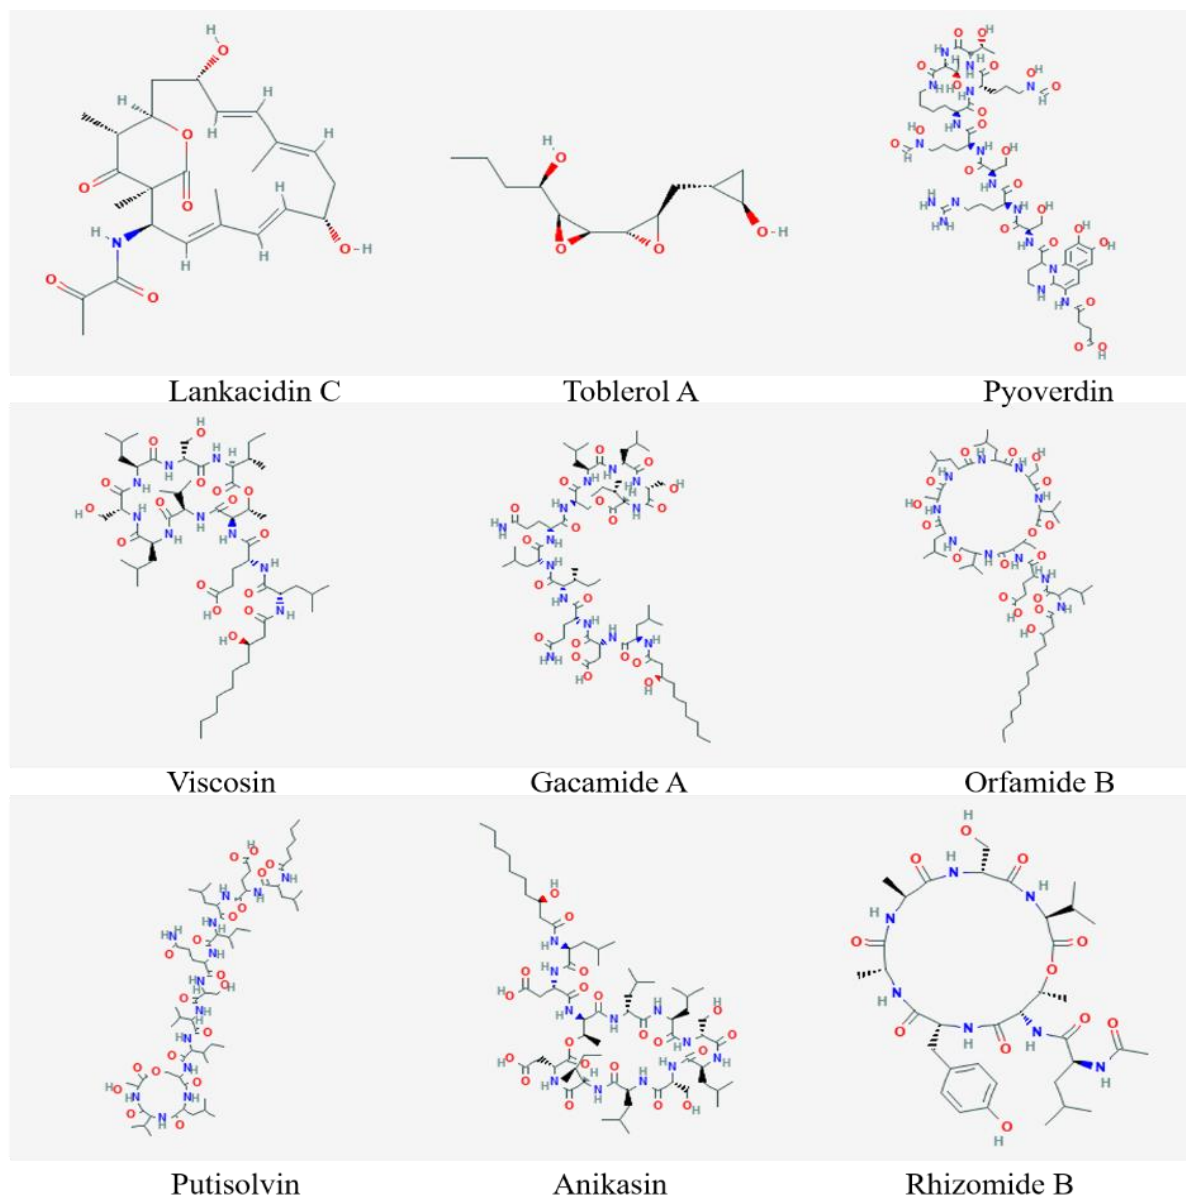

**Figure S2.** Predicted structures of secondary metabolites recognized for the ZCR6 strain. The structure was obtained from PubChem Compound (<https://pubchem.ncbi.nlm.nih.gov/>).
